# Supplementary material
Source: PubMed Central journal article supplement (PMC4114944)
Supplement: supp_tpc.113.121657_tpc121657_Supplemental.pdf [file supp_tpc.113.121657_tpc121657_Supplemental.pdf]

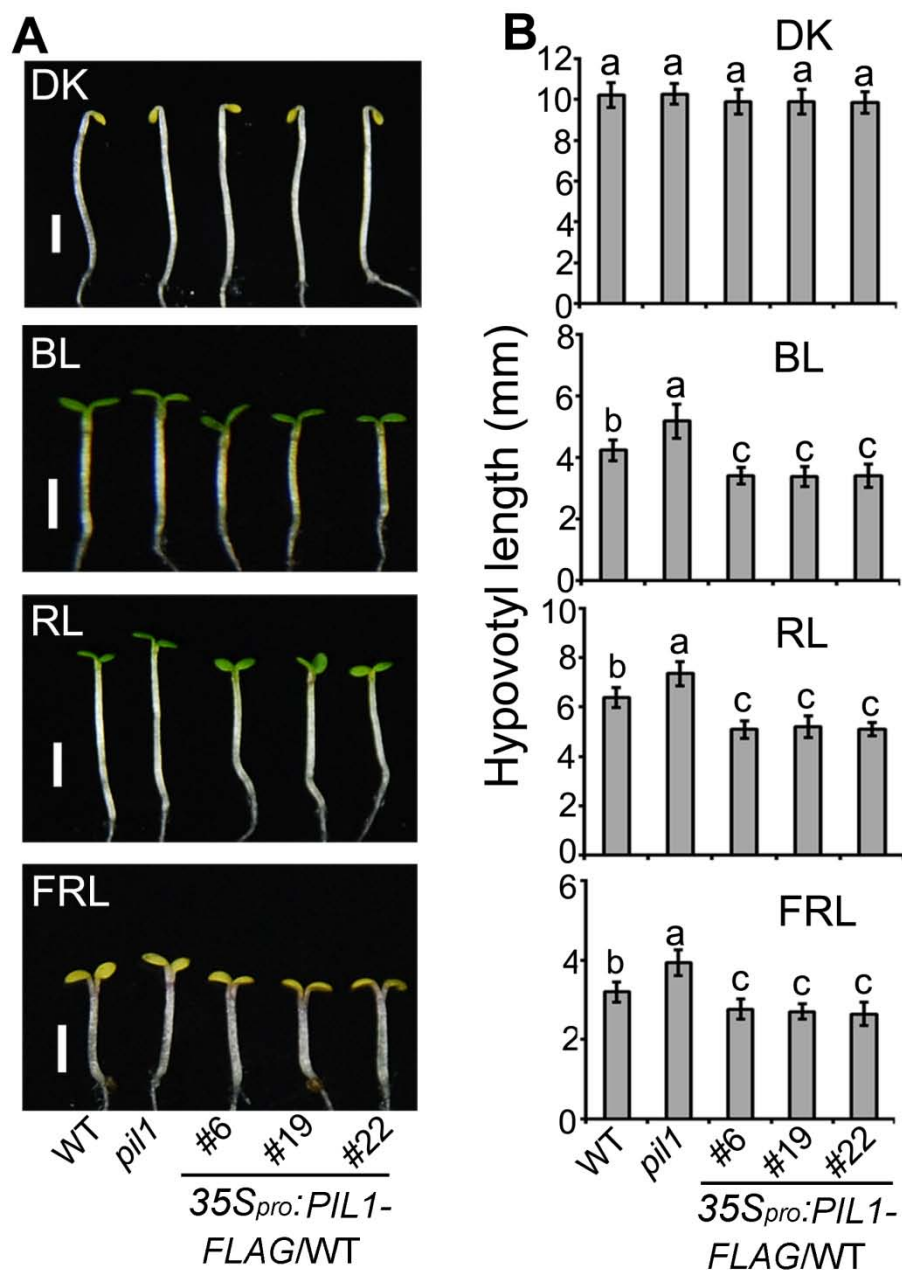

**Supplemental Figure 1. Transgenic  $35S_{pro}:PIL1-FLAG$  Plants Display Inhibited Hypocotyl Elongation Phenotypes under Light Conditions.** (A) Photograph of representative seedlings of indicated genotypes. Seedlings were grown under continuous indicated conditions for 4 d. Bars, 2 mm. DK, darkness; BL, blue light; RL, red light; FRL, far-red light. #6, #19 and #22, three independent lines of  $35S_{pro}:PIL1-FLAG/WT$  transgenic plants. (B) Quantification of hypocotyl lengths of the seedlings shown in (A). Error bars represent  $\pm$  SD ( $n = 30$ ). The letters “a” to “c” indicate statistically significant differences between means for hypocotyl lengths of indicated genotypes determined by Tukey’s LSD test ( $P \leq 0.01$ ).

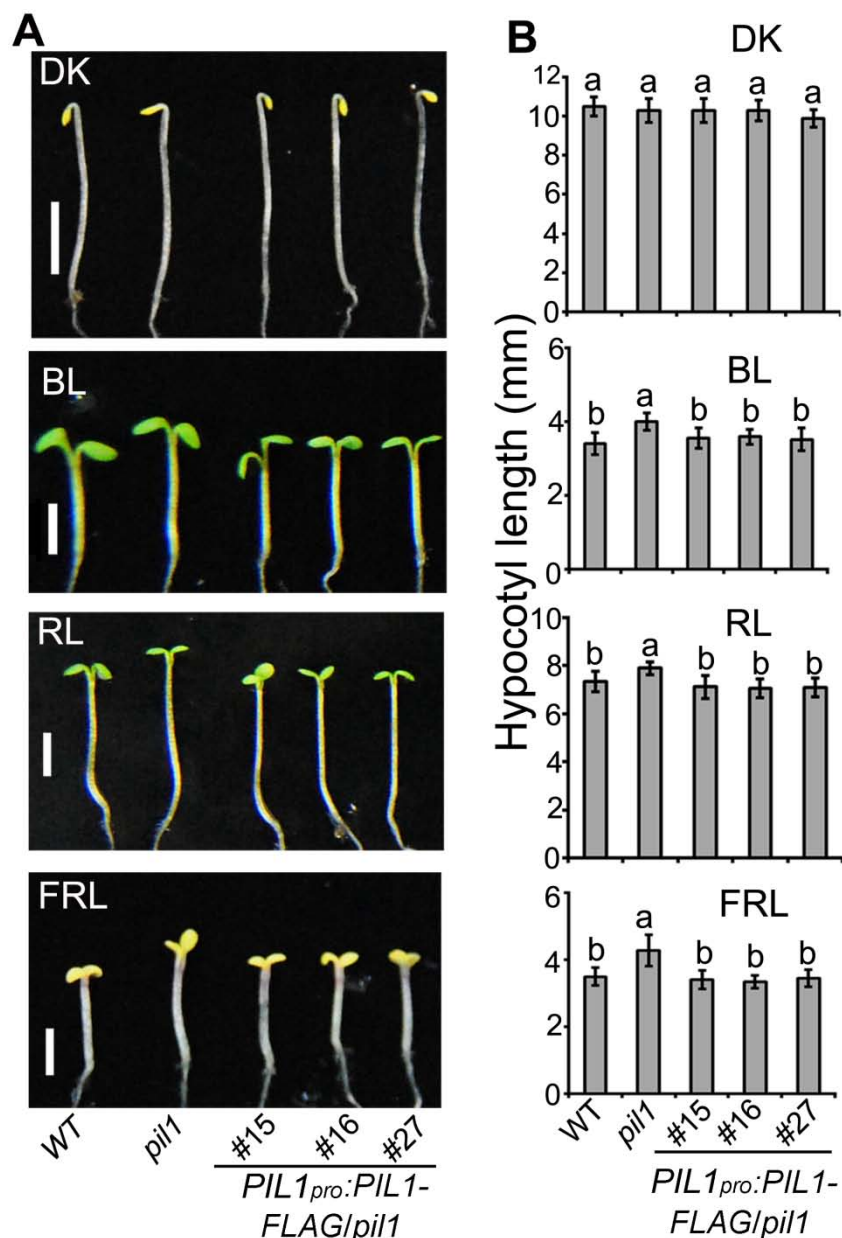

**Supplemental Figure 2. Expression of *PIL1-FLAG* under the Control of the *PIL1* Native Promoter in the *pil1* Mutant Rescues the Elongated Hypocotyl Phenotype.**

(A) Photograph of representative seedlings of indicated the genotypes. Seedlings grown under continuous indicated conditions for 4 d. Bars, 2 mm. DK, darkness; BL, blue light; RL, red light; FRL, far-red light. #15, #26 and #27, three independent lines of *PIL1<sub>pro</sub>:PIL1-FLAG/pil1* transgenic plants. (B) Quantification of hypocotyl lengths of the seedlings shown in (A). Error bars represent  $\pm$  SD ( $n = 30$ ). The letters “a” and “b” indicate statistically significant differences between means for hypocotyl length of indicated genotypes determined by Tukey’s LSD test ( $P \leq 0.01$ ).

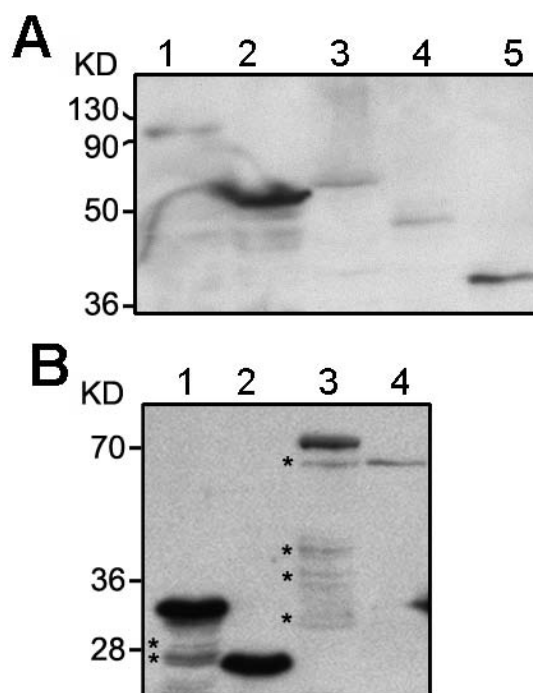

**Supplemental Figure 3. Immunoblot Analysis of the Protein Levels of COP1 and PIL1 Fragments in Yeast Cells.** (A) and (B) Total protein extracted from transformed yeast cells was subjected to immunoblot analysis with anti-LexA (A) and anti-HA (B) antibodies, respectively. Yeast cells expressing the indicated combination of constructs are numbered as (A) 1, COP1/PIL1; 2, COP1 $\Delta$ 283-675/PIL1; 3, COP1 $\Delta$ 1-282/PIL1; 4, COP1 $\Delta$ 1-386/PIL1; 5, COP1 $\Delta$ 1-282 $\Delta$ 387-675/PIL1; and (B) 1, COP1/PIL1 $\Delta$ 1-283; 2, AD/BD; 3, COP1/PIL1; 4, COP1/PIL1 $\Delta$ 283-416. Asterisks denote degraded protein.

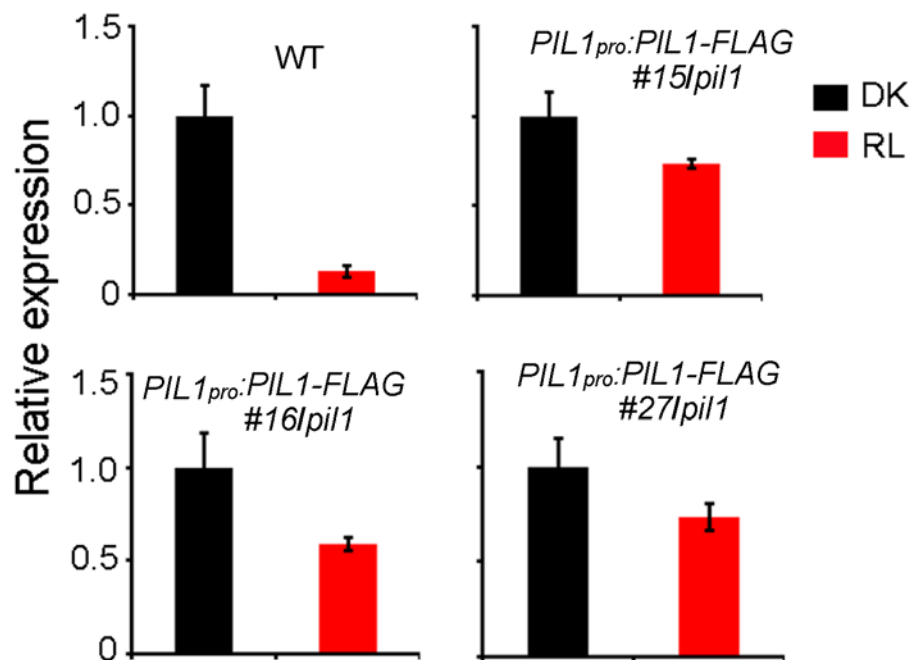

**Supplemental Figure 4. qRT-PCR Analysis Showing the Expression of *PIL1* in *PIL1<sub>pro</sub>:PIL1-FLAG/pil1* Seedlings.** The seedlings were grown in darkness for 4 d (DK), and then transferred to red light for 60 min (RL). Expression levels were normalized to an internal *ACTIN2* control and presented relative to the seedlings grown in darkness set at unity. Error bars represent  $\pm$  SD ( $n = 3$ ). WT represents wild type; #15, #16, and #27 represent three independent lines of *PIL1<sub>pro</sub>:PIL1-FLAG/pil1* transgenic plants.

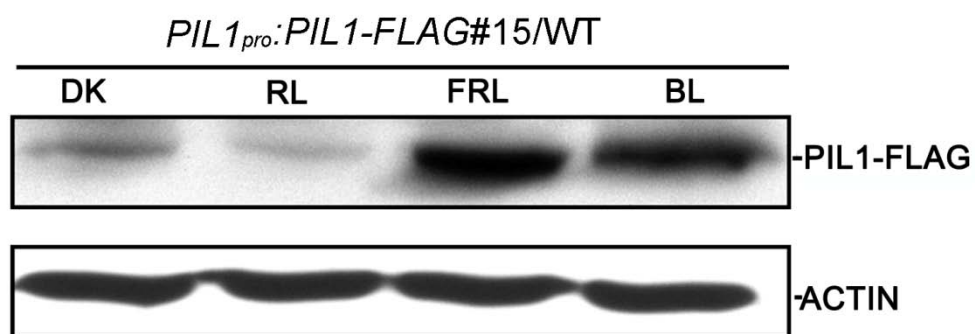

**Supplemental Figure 5. Immunoblot Analysis Showing PIL1-FLAG Accumulation in *PIL1<sub>pro</sub>:PIL1-FLAG#15/pil1* Seedlings.** Total protein from *PIL1<sub>pro</sub>:PIL1-FLAG#15/pil1* seedlings grown in continuous darkness (DK) and the indicated light conditions for 4 d were subjected to immunoblot analysis with anti-FLAG and anti-ACTIN antibodies. RL, red light; FRL, far-red light; BL, blue light.

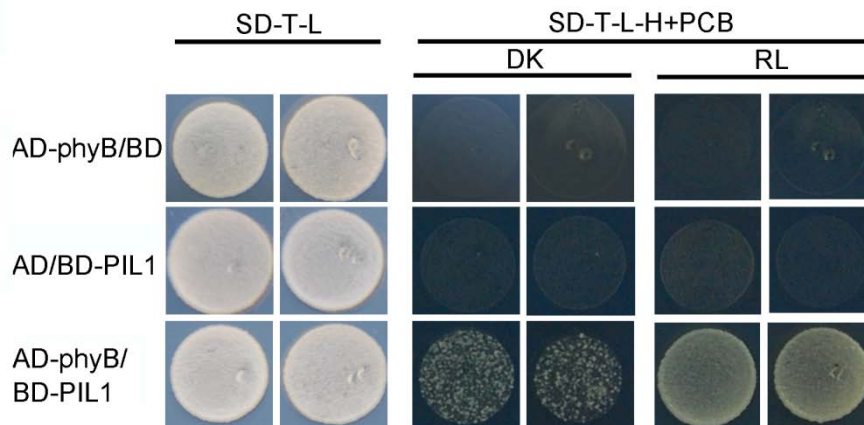

**Supplemental Figure 6. PIL1 Preferentially Interacts with the Pfr Form of phyB.**

Yeast cells coexpressing the constructs of indicated combinations, were grown on nonselective (SD-T-L) or selective media with 25  $\mu$ M PCB (SD-T-L-H+PCB) in continuous red light (RL= 3  $\mu$ mol/s $\cdot$ m<sup>2</sup>) or darkness (DK) for 6 d.

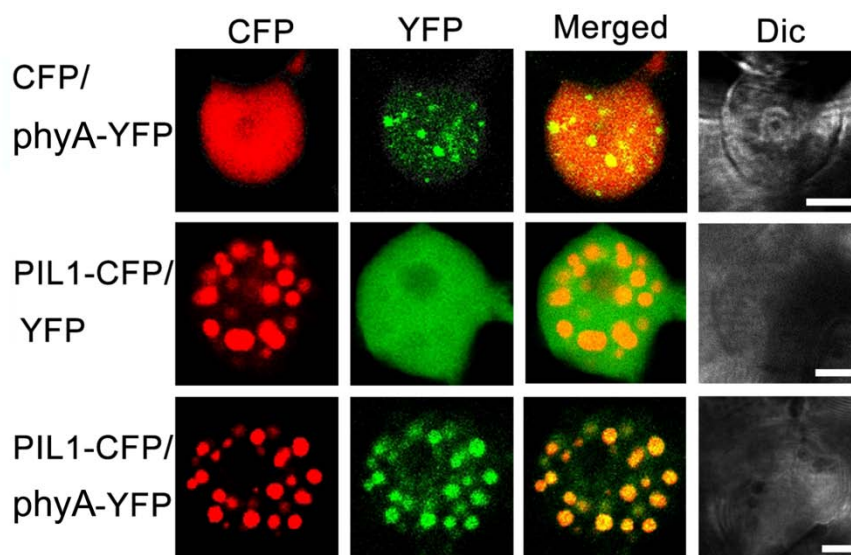

**Supplemental Figure 7. PIL1 and phyA Localize Together to NBs in Tobacco Cells.** Dic, differential interference contrast. Bars, 5  $\mu$ m.

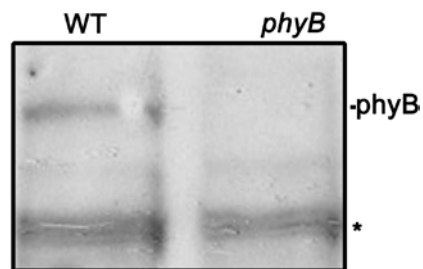

**Supplemental Figure 8. Immunoblot Analysis Showing Specificity of Anti-phyB Antibody.** phyB is detected in WT and *phyB* by immunoblotting used anti-phyB antibody. The asterisks show non-specific bands.



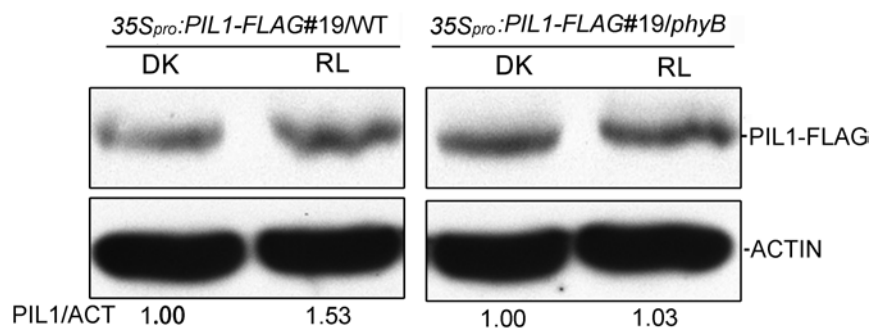

**Supplemental Figure 9. PIL1 Accumulation is Promoted by phyB in Continuous Red Light Conditions.** Total protein from *35S<sub>pro</sub>:PIL1-FLAG#19/WT* and *35S<sub>pro</sub>:PIL1-FLAG#19/phyB* seedlings grown in continuous darkness (DK) and red light (RL) for 4 d was subjected to immunoblot analysis with anti-FLAG and anti-ACTIN antibodies. PIL1/ACTIN indicates the band intensities of PIL1-FLAG normalized to ACTIN and is presented relative to that in darkness set at unity.

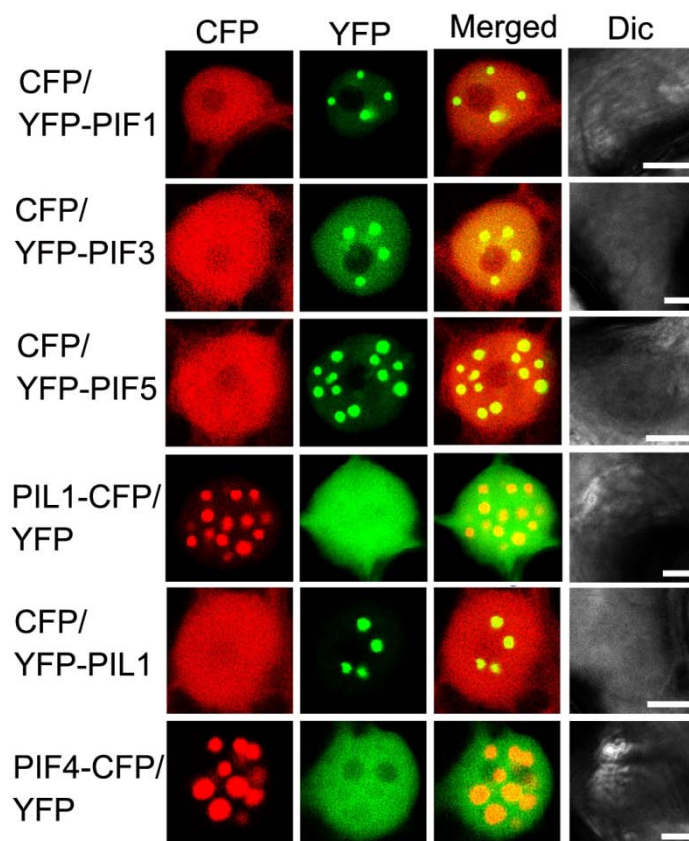

**Supplemental Figure 10. Negative Controls Showing No Colocalization of CFP with YFP-PIF1, YFP-PIF3, YFP-PIF5, or YFP-PIL1, and YFP with PIL1-CFP or PIF4-CFP in Vivo.** Dic, differential interference contrast. Bars, 5  $\mu$ m.



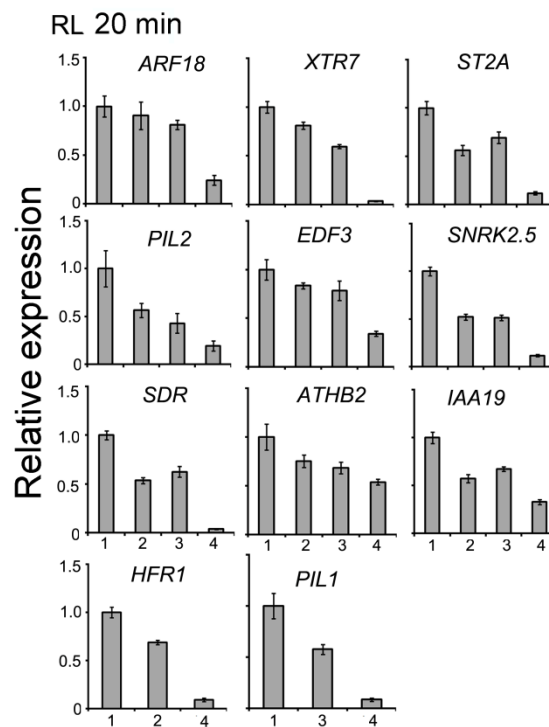

**Supplemental Figure 12. Expression of PIF Direct-Target Genes is Suppressed in Transgenic Plants Overexpressing *PIL1* and *HFR1*.** Expression levels were determined by qRT-PCR, normalized to an internal *ACTIN2* control and presented relative to the wild type set at unity. 1, WT; 2,  $35S_{pro}:PIL1-FLAG\#19/WT$ ; 3,  $35S_{pro}:GFP-HFR1/hfr1$ ; 4, *pifq*. Data are represented as the mean of biological triplicates  $\pm$  SD ( $n = 3$ ). The seedlings were grown in darkness for 3 d and exposed to red light for 20 min.

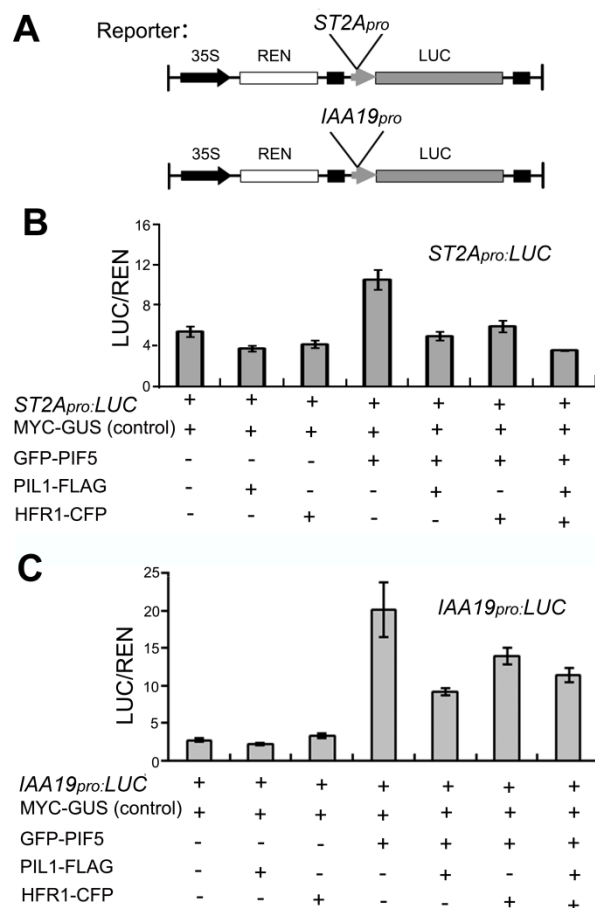

**Supplemental Figure 13. PIL1 and HFR1 Suppress *ST2A* and *IAA19* Expression in the Dual-Luciferase Assay.** (A) Schematic presentation of the reporter construct expressing *LUC* under the control of *ST2A* and *IAA19* promoters (*ST2A<sub>pro</sub>* and *IAA19<sub>pro</sub>*), respectively. (B) and (C) Tobacco leaves were infiltrated with the strains harboring the *ST2A<sub>pro</sub>:LUC* (B) or *IAA19<sub>pro</sub>:LUC* (C) reporter and effectors in the indicated combinations. The values represent the ratio of *LUC* activities to *REN* activities (*LUC/REN*). Error bars represent  $\pm$  SD ( $n = 3$ ).

**Supplemental Table 1. List of Vectors and Primers Used in This Work.**

| Assays                     | Destination products          | Template                                    | Primer name | Primer sequence                             |                                          |
|----------------------------|-------------------------------|---------------------------------------------|-------------|---------------------------------------------|------------------------------------------|
| Yeast two-hybrid           | pB42AD-PI L1                  | PIL1                                        | PIL1F1      | 5'-GCCGGATCCATGGAAGCAAAACCCT TAGCATCA-3'    |                                          |
|                            |                               |                                             | PIL1R1      | 5'-GGACTAGTTTAGTTTGGCGAGCGATA ATAACT-3'     |                                          |
|                            | pB42AD-PI L1 $\Delta$ 284-416 |                                             | PIL1F1      | 5'-GGACTAGTCTGAACTTGAAGTTGAA GGG TCCG-3'    |                                          |
|                            |                               |                                             | PIL849R1    |                                             |                                          |
|                            | pB42AD-PI L1 $\Delta$ 1-283   |                                             | PIL1850F1   | 5'-GCCGGATCCATGATGAGTATGGGAAA TGGATTA-3'    |                                          |
|                            |                               |                                             | PIL1R1      |                                             |                                          |
|                            | pBrige-PIL1                   |                                             | PIL1F2      | 5'-GCCGGATCCGGATGGAAGCAAAACC CTTAGCATCA-3'  |                                          |
|                            |                               |                                             | PIL1R2      | 5'-GGGGTTCGACTTAGTTTGGCGAGCGA TAATAACT-3'   |                                          |
|                            | pBrige-PIL1 $\Delta$ APB      |                                             | PIL1F2      | 5'-TCTTTGGTCTTTTAAATTTGGTTTAA TGT TTGA-3'   |                                          |
|                            |                               |                                             | PIL181R1    | 5'-AAAATTA AAAAAGACCAAAGAACAA CGGTTCTTTT-3' |                                          |
|                            |                               |                                             | PIL1139F1   |                                             |                                          |
|                            |                               |                                             | PIL1R2      | 5'-CGGAATTCATGGAAGAGATTTTCGAC GGATCCG-3'    |                                          |
|                            | LexA-COP1                     |                                             | COP1        | COP1F1                                      | 5'-CCCCTCGAGTCACGCAGCGAGTACC AGAACTTT-3' |
|                            |                               |                                             |             | COP1R1                                      |                                          |
|                            | COP1F1                        |                                             |             |                                             |                                          |
|                            | COP1N282R                     |                                             |             |                                             |                                          |
| LexA-COP1 $\Delta$ 283-675 | COP1C                         |                                             |             |                                             |                                          |
|                            | T1F                           | 5'-CCCCTCGAGTCACGAATCTGACCCA CTCAGCGCATC-3' |             |                                             |                                          |
| COP1 $\Delta$ 283-675      | COP1R1                        |                                             |             |                                             |                                          |
|                            | COP1C                         | 5'-CGGAATTCCAAAGTTTGAATCAGTC AACTGTC-3'     |             |                                             |                                          |
|                            | T2F                           |                                             |             |                                             |                                          |
|                            | COP1R1                        |                                             |             |                                             |                                          |
|                            |                               | COP1C                                       |             |                                             |                                          |

|                |                     |      |                                         |                                                                                                                             |
|----------------|---------------------|------|-----------------------------------------|-----------------------------------------------------------------------------------------------------------------------------|
|                | LexA-COP1Δ1-282     |      | T2F<br>COP1R1<br>COP1C                  | 5'-CGGAATTCGCCACTGCTGGTGTCTTCTAGATGT-3'                                                                                     |
|                | LexA-COP1Δ1-386     |      | T1F<br>COP1C<br>T3R<br>HFR1F1<br>HFR1R1 | 5'-CGGAATTCGCCACTGCTGGTGTCTTCTAGATGT-3'                                                                                     |
|                | LexA-Δ1-282Δ387-675 |      | PIF5F1                                  |                                                                                                                             |
|                | LexA-HFR1           | HFR1 | PIF5R1<br>phyBF1<br>phyBR1              | 5'-CCCCTCGAGAAACAGCTCATCATCACGATCAAA-3'<br>5'-CGGAATTCATGTCGAATAATCAAGCTTTCATG-3'                                           |
|                | pGADT7-PIF5         | PIF5 |                                         | 5'-CCCCTCGAGTCATAGTCTTCTCATCGCATGGGA-3'<br>5'-CGGAATTCATGGAACAAGTGTTTGC TGATTGG-3'                                          |
|                | pGADT7-phyB         | phyB |                                         | 5'-CCCCTCGAGTCAGCCTATTTACCCATATGAAGA-3'<br>5'-GGCCAATTGATGGTTTCCGGAGTCGGGGTAGT-3'<br>5'-CCCCCGGGCTAATATGGCATCATCAGCATCAT-3' |
| Colocalization | pHB-CFP             | CFP  | CFPF1<br>CFPR2                          | 5'-GGACTAGTATGGTGAGCAAGGGCGAGGAGCTG-3'<br>5'-CGGAGCTCTTACTTGTACAGCTCGTCCATGCC-3'                                            |
|                | pHB-PIL1-CFP        | PIL1 | PIL1F1<br>PIL1R3                        | 5'-GGACTAGTGTGGCGAGCGATAATAACTAAA-3'                                                                                        |

|                         |      |                   |                                                         |
|-------------------------|------|-------------------|---------------------------------------------------------|
| pEarleyGat<br>e104-PIL1 |      | PIL1attr<br>1     | 5'-CACCATGGAAGCAAACCCTTAGCA<br>TCA-3'                   |
|                         |      | PIL1attr<br>2     | 5'-TTAGTTTGGCGAGCGATAATAACT-3'                          |
| pEarleyGat<br>e104-COP1 | COP1 | COP1att<br>r1     | 5'-CACCATGGAAGAGATTTTCGACGGAT<br>CCG-3'                 |
|                         |      | COP1att<br>r2     | 5'-TCACGCAGCGAGTACCAGAACTTT-3<br>'                      |
| pHB-PIF4-<br>CFP        | PIF4 | PIF4infu<br>sionF | 5'-TCCTGCAGCCCGGGGGATCCAATGG<br>AACACCAAGGTTGGAGTTTT-3' |
|                         |      | PIF4infu<br>sionR | 5'-GCCCTTGCTCACCATACTAGTGTGGT<br>CCAAACGAGAACCGTCGGT-3' |
| pEarleyGat<br>e101-HFR1 | HFR1 | HFR1att<br>r1     | 5'-CACCATGTCTGAATAATCAAGCTTTCA<br>TG-3'                 |
|                         |      | HFR1att<br>r2     | 5'-TAGTCTT CTCATCGCATGGGAAGA-3'                         |
| pEarleyGat<br>e101-phyB | phyB | phyBattr<br>1     | 5'-CACCATGGTTTCCGGAGTCGGGGGT<br>AGT-3'                  |
|                         |      | phyBattr<br>2     | 5'-ATATGGCATCATCAGCATCATGTC-3'                          |
| pEarleyGat<br>e104-PIF1 | PIF1 | PIF1attr<br>1     | 5'-CACCATGGATCCTCAGCAGCAACCT<br>TCT-3'                  |
|                         |      | PIF1attr<br>2     | 5'-TTAACCTGTTGTGTGGTTTCCGTG-3'                          |
| pEarleyGat<br>e104-PIF3 |      | PIF3attr<br>1     | 5'-CACCATGCCTCTGTTTGAGCTTTTCA<br>GG-3'                  |
|                         |      | PIF3attr<br>2     | 5'-TCACGACGATCCACAAAACCTGATC-3<br>'                     |



|      |                     |              |                            |                                                                                                                                              |
|------|---------------------|--------------|----------------------------|----------------------------------------------------------------------------------------------------------------------------------------------|
|      | pEarleyGate104-PIF5 | PIF5         | PIF5attr<br>1              | 5'-CACCATGGAACAAGTGTTTGCTGAT<br>TGG-3'                                                                                                       |
|      | pHB-YFP             | YFP          | YFPF1<br><br>YFPR1         | 5'-<br>GCCTATTTTACCCATATGAAGACT-3'<br><br>5'-CCCAAAGCTTATGGTGAGCAAGGGC<br>GAGGAGCTG-3'<br><br>5'-CGG<br>AGCTCTTACTTGTACAGCTCGTCCATGC<br>C-3' |
| BiFC | pXY104-PI<br>L1     | PIL1         | PIL1F1<br>PIL1R4           | 5'-GTCGACGTTTGGCGAGCGATAATAA<br>CTAAA-3'                                                                                                     |
|      | pXY106-PI<br>L1     |              | PIL1F1<br>PIL1R5           | 5'GGGGTCGACTTAGTTTGGCGAGCGA<br>TAAT-3'                                                                                                       |
|      | pXY106-PI<br>L1ΔAPB | PIL1ΔA<br>PB | PIL1F1<br>PIL1R4           |                                                                                                                                              |
|      | pXY106-H<br>FR1     | HFR1         | HFR1F2<br>HFR1R2<br>PIF1F1 | 5'-GCCGGATCCATGTCGAATAATCAAG<br>CTTTCATG-3'<br><br>5'-GGACTAGTTAGTCTTCTCATCGCAT<br>GGGAAGA-3'                                                |
|      | pXY106-PI<br>F1     | PIF1         | PIF1R1<br><br>PIF3F1       | 5'-GCTTCTAGAATGGAACAAGTGTTG<br>CTGATTGG-3'<br><br>5'-GGGGTCGACGCCTATTTTACCCATA<br>TGAAGACT-3'                                                |
|      | pXY106-PI           | PIF3         | PIF3R1                     | 5'-GCCGGATCCATGCCTCTGTTTGAGC                                                                                                                 |

|        |                                 |                            |                            |                                             |
|--------|---------------------------------|----------------------------|----------------------------|---------------------------------------------|
|        | F3                              |                            |                            | TTTTCAGG-3'                                 |
|        | pXY106-PI                       | PIF4                       | PIF4F1                     | 5'-GGGGTCGACTCACGACGATCCACAA<br>AACTGATC-3' |
|        | F4                              |                            | PIF4R2                     | 5'-GCTTCTAGAATGGAACACCAAGGTT<br>GGAGTTTT-3' |
|        | pXY104-PI                       | PIF5                       | PIF5F2                     | 5'-GGGGTCGACCTAGTGGTCCAAACGA<br>GAACCGTC-3' |
|        | F5                              |                            | PIF5R2                     | 5'-GCCGGATCCATGGAACAAGTGTTTG<br>CTGATTGG-3' |
|        | pXY104-ph                       | phyB                       | phyBF2                     | 5'-GGGGTCGACGCCTATTTTACCCATA<br>TGAAGA-3'   |
|        | yB                              |                            | phyBR2                     | 5'-CCCCGGGGGATGGTTTCCGGAGTC<br>GGGGGTAGT-3' |
|        |                                 |                            |                            | 5'-GCTTCTAGAACTACCCCCGACTCCG<br>GAAACCAT-3' |
| Dual-L | PGreen_08                       | <i>PIL1<sub>pro</sub></i>  | <i>PIL1<sub>pro</sub>F</i> | 5'-GCCGGATCCCGTATTCGTATAGAAT<br>AGTTTATT-3' |
| UC     | 00- <i>PIL1<sub>pro</sub></i> - |                            | 1                          |                                             |
|        | LUC                             |                            | <i>PIL1<sub>pro</sub>R</i> | 5'-GCTTCTAGATGAAGTAACTGAACA<br>AAGCTTTC-3'  |
|        | PGreen_08                       | <i>IAA19<sub>pro</sub></i> | 1                          |                                             |
|        | 00- <i>IAA19<sub>pro</sub></i>  |                            | <i>IAA19<sub>pro</sub></i> | 5'-GCCGGATCCGAGTTCTAAATTTTGA<br>CTTAACTA-3' |
|        | -LUC                            | <i>ST2A<sub>pro</sub></i>  | <i>IAA19<sub>pro</sub></i> | 5'-GCTTCTAGATTCTTGAACCTCTTTTT<br>TTCCTCT-3' |
|        | PGreen_08                       |                            | <i>ST2A<sub>pro</sub>F</i> | 5'-GCCGGATCCTAAAGATTAAGAAAA<br>GGATAAAC-3'  |
|        | 00- <i>ST2A<sub>pro</sub></i> - | HFR1                       | 1                          |                                             |
|        | LUC                             |                            | <i>ST2A<sub>pro</sub></i>  | 5'-GCTTCTAGATGTTTTTTTTTGTATAG<br>ATATAT-3'  |
|        | pHB-HFR1                        |                            | HFR1F2                     |                                             |

|                    |                                       |                           |                                 |                                                                                        |
|--------------------|---------------------------------------|---------------------------|---------------------------------|----------------------------------------------------------------------------------------|
|                    | -CFP                                  | GFP                       | HFR1R3                          |                                                                                        |
|                    |                                       |                           | GFPF1                           | 5'-GGACTAGTTCTTCTCATCGCATGGG<br>AAGA-3'                                                |
|                    | pBs-GFP-PI                            |                           | GFPR1                           | 5'-CCCCTCGAGATGGTGAGCAAGGGCG<br>AGGAGCTG-3'                                            |
|                    | F5                                    | PIF5                      | PIF5F2                          | 5'-CCCAAAGCTTTTACTTGTACAGCTCG<br>TCCATGCC-3'                                           |
|                    |                                       | MYC                       | MYCF1                           | 5'-GGACTAGTTCAGCCTATTTTACCCA<br>TATGAAGA-3'                                            |
|                    | pKL71-MY                              |                           | MYCR1                           | 5'-CCCCTCGAGCGGTATCGATTAA<br>GCTATGGA-3'                                               |
|                    | C-GUS                                 | GUS                       | GUSF1                           | 5'-CGG<br>AGCTCCCCGGGCTGCAGGAATTCAA<br>GT-3'                                           |
|                    |                                       |                           | GUSR1                           | 5'-CGGAGCTCATGTTACGTCCTGTAG<br>AAACCCCA-3'<br>GCTTCTAGATCATTGTTTGCCTCCCT<br>GCTGCGG-3' |
| Transfo<br>rmation | pCAMBIA<br>1300-NOS                   | NOS                       | NOSF1                           | 5'-GCCGGATCCGAATTCATGGGCCCA<br>CTAGTTCGTTCAAACATTTGGCAATAA<br>AG-3'                    |
|                    |                                       |                           | NOSR1                           | 5'-GGCCAATTGGCTGTCGAGGGGGGAT<br>CAATTCCC-3'                                            |
|                    | pCAMBIA<br>1300- <i>pPIL1</i><br>-NOS | <i>PIL1<sub>pro</sub></i> | <i>PIL1<sub>pro</sub>F</i><br>2 | 5'-GCTTCTAGACGTATTCGTATAGAAT<br>AGTTTATT-3'                                            |
|                    |                                       | PIL1                      | <i>PIL1<sub>pro</sub>R</i><br>2 | 5'-GCCGGATCCTGAAGTAACTGAACA<br>AAGCTTTC-<br>3'                                         |
|                    | pBS-PIL1-F<br>LA                      |                           | PIL1F1<br>PIL1R2                |                                                                                        |

|                    |         |        |  |                               |
|--------------------|---------|--------|--|-------------------------------|
| G                  | pBS-PIL |        |  |                               |
| pCAMBIA            | 1-FLAG  |        |  |                               |
| 1300- <i>pPIL1</i> |         | PIL1F1 |  |                               |
| -PIL1FLAG          | GFP     | pBSR1  |  | 5'-GCTTCTAGATAAAGGGAACAAAAG   |
| -NOS               |         |        |  | CTGGAGCTC-3'                  |
| pBS-PIL1-          |         | GFPF2  |  | 5'-GCCGGATCCATGGTGAGCAAGGGCG  |
| GFP                |         |        |  | AGGAGCTG-3'                   |
|                    | PIL1    | GFPR2  |  | 5'-GGACTAGTTTACTTGTACAGCTCGTC |
|                    |         |        |  | CATGCC-3'                     |
|                    |         | PIL1F3 |  | 5'-GGGGTCGACATGGAAGCAAAACCCT  |
|                    |         |        |  | TAGCATCA-3'                   |
|                    |         | PIL1R6 |  | 5'-GCCGGATCCGTTTGGCGAGCGATAAT |
|                    |         |        |  | AACTAAA-3'                    |

## Supplemental Methods

### Supplemental Method 1. Growth Conditions

Seeds were sown on Murashige and Skoog (MS) medium and were cold treated for 3 d at 4 °C. After exposure to white light for 12 h to stimulate germination, plates with seeds were transferred to appropriate light conditions for 3 to 4 d at 22 °C. Blue, red, and far-red light were supplied by LED light sources, with irradiance fluence rates of: 15  $\mu\text{mol}/\text{m}^2/\text{s}$ , 8  $\mu\text{mol}/\text{m}^2/\text{s}$ , and 2  $\mu\text{mol}/\text{m}^2/\text{s}$ , respectively, unless otherwise indicated. Light intensity was measured with an ILT1400-A radiometric photometer (ILT). For MG132 and DMSO treatments, seedlings were first grown on solid MS medium for 4 d, and then transferred to liquid MS medium containing MG132 (50  $\mu\text{M}$ , dissolved in DMSO) or 0.5% DMSO under the indicated light conditions.

### Supplemental Method 2. Plasmid Construction

PCR-amplified fragments encoding GFP and full-length PIL1 without terminator were ligated into *Bam*HI-*Spe*I and *Xho*I-*Bam*HI sites of pBluescript SKt (abbreviated as pBS), respectively, resulting in pBS-PIL1-GFP, and fragment encoding full-length PIL1 without terminator cloned into the *Bam*HI-*Spe*I sites of pBS-3 $\times$ FLAG (Liu et al., 2008), resulting in pBS-PIL1-FLAG. Fragments encoding PIL1-GFP and PIL1-3 $\times$ FLAG, were excised by *Sal*I-*Sac*I and cloned into the plant expression vector pKYL71 (Schardl et al., 1987) to generate pKYL71-PIL1-GFP and pKYL71-PIL1-3 $\times$ FLAG, respectively.

To make constructs expressing BD-PIL1  $\Delta$  APB and nYFP-PIL1  $\Delta$  APB, the fragment encoding PIL1  $\Delta$  APB (PIL1 lacking 28-46 amino acid) was obtained by overlapping PCR with primers listed in Supplemental Table 1 online, excised by *Bam*HI- *Sal*I or *Bam*HI-*Spe*I, and cloned into the pBbrige (Clontech) and pXY106 vectors, respectively, to generate BD-PIL1  $\Delta$  APB and nYFP-PIL1  $\Delta$  APB. To make constructs for the Dual-LUC assay, PCR-amplified fragments encoding GFP without terminator and full-length PIF5 were cloned into *Xho*I-*Hind*III and *Bam*HI -*Spe*I sites of pBS, respectively, resulting in pBS-GFP-PIF5. Fragment encoding GFP-PIF5, was

excised by *XhoI-SacI* and cloned into pKYL71 to generate pKYL71-GFP-PIF5. Fragment encoding 6×MYC and full-length GUS were cloned into *XhoI-SacI* and *SacI-XbaI* sites of pKYL71, respectively, resulting in pKYL71-MYC-GUS. All of the constructs used were confirmed by DNA sequencing. Other constructs were generated through PCR and subsequent cloning into the corresponding vectors listed in Supplemental Table 1 online. All the primers used in the study are also listed in Supplemental Table 1 online.

### **Supplemental Method 3. Construction of Double, Triple, and Quintuple Mutants**

To generate *pill hfr1* double mutants, *pill-2* was crossed with *hfr1-201*. F2 seeds were plated and then grown on soil to the adult stage. PCR was used to confirm the double mutants. For the construction of the *cop1 pill*, *cop1 hfr1* and *cop1 pill hfr1* mutants, we firstly crossed *cop1-4* with *pill-2* and *hfr1-201* respectively. F2 seeds were plated and grown under darkness for 3 d. The seedlings with short hypocotyls and expanded cotyledons were chosen and grown on soil and the double mutants were confirmed by PCR. Then we crossed *cop1 pill* with *cop1 hfr1*, and identified the *cop1 pill hfr1* triple mutant in F2. For the construction of the *pill pifq* quintuple mutant, *pifq* was crossed with *pill-2*. F2 seeds were plated and grown under blue light for 4 d, and the seedlings with taller hypocotyls were chosen and grown on soil, and the seedlings containing homozygous *pill-2* mutations were confirmed by PCR. The F3 seeds were plated and grown under blue light for 4 d, and seedlings with shorter hypocotyls were identified. The final confirmation of the *pill pifq* quintuple mutant was performed by PCR. All the primers used in PCR were described previously (Soh, 2000; Yamashino et al., 2003; Huq et al., 2004; Monte et al., 2004; Khanna et al., 2007; Leivar et al., 2008).

### **Supplemental Method 4. Hypocotyl Length Measurements**

Thirty seedlings grown for 4 d under the indicated light conditions were photographed and the resulting digital photographs were subjected to measurements of hypocotyl lengths using ImageJ software (<http://rsbweb.nih.gov/ij/>).

### **Supplemental Method 5. Fluorescence Microscopy**

Root cells of the 4-d-old *35S<sub>pro</sub>:PIL1-GFP#5/WT* and *35S<sub>pro</sub>:PIL1-GFP#5/cop1* seedlings grown on MS medium under different treatments were analyzed using a confocal microscope with GFP filter sets. All fluorescence images were taken with identical exposure.

### **Supplemental Method 6. Antibodies**

Rabbits were vaccinated with synthesized peptide (CVPRKRPLSTASGSG) to generate anti-phyB antiserum. The anti-phyB antibody was further purified from the antiserum using protein A. The anti-ACTIN, -HA, and -LexA antibodies were purchased from Abmart Inc. and Merck Inc.

### **Supplemental Method 7. Yeast Protein Extraction**

All yeast cells were harvested when OD600 was at 0.4~0.6. Equal amounts of yeast cells for each sample were calculated from OD600. The total yeast protein was extracted using A Yeast Protein Extraction kit according to the manufacture's manual (CWbiotech Inc. Cat#CW0890).

### **Supplemental Method 8. qRT-PCR**

Total RNA (500 ng) was reverse-transcribed using the PrimeScript RT Reagent Kit (Takara). Amplification was carried out with SYBR Premix Ex Taq II (Takara). Real-time PCR was performed in a CFX96 Real time system (Bio-Rad). The thermal profile for real-time PCR was 95 °C for 2 min, followed by 40 cycles of 95 °C for 15 s and 60 °C for 30 s. The expression of PIF direct-target genes was normalized against the expression of the endogenous control gene *ACTIN2*. All experiments were performed with three independent biological replicates in three technical repetitions each. The RT-PCR primers were described previously (Zhang et al., 2013).

## Supplemental References

- Huq, E., Al-Sady, B., Hudson, M., Kim, C., Apel, K., and Quail, P.H.** (2004). Phytochrome-interacting factor 1 is a critical bHLH regulator of chlorophyll biosynthesis. *Science* **305**, 1937-1941.
- Khanna, R., Shen, Y., Marion, C.M., Tsuchisaka, A., Theologis, A., Schäfer, E., and Quail, P.H.** (2007). The basic helix-loop-helix transcription factor PIF5 acts on ethylene biosynthesis and phytochrome signaling by distinct mechanisms. *Plant Cell* **19**, 3915-3929.
- Leivar, P., Monte, E., Al-Sady, B., Carle, C., Storer, A., Alonso, J.M., Ecker, J.R., and Quail, P.H.** (2008). The Arabidopsis phytochrome-interacting factor PIF7, together with PIF3 and PIF4, regulates responses to prolonged red light by modulating phyB levels. *Plant Cell* **20**, 337-352.
- Liu, L.J., Zhang, Y.C., Li, Q.H., Sang, Y., Mao, J., Lian, H.L., Wang, L., and Yang, H.Q.** (2008). COP1-mediated ubiquitination of CONSTANS is implicated in cryptochrome regulation of flowering in Arabidopsis. *Plant Cell* **20**, 292-306.
- Monte, E., Tepperman, J.M., Al-Sady, B., Kaczorowski, K.A., Alonso, J.M., Ecker, J.R., Li, X., Zhang, Y., and Quail, P.H.** (2004). The phytochrome-interacting transcription factor, PIF3, acts early, selectively, and positively in light-induced chloroplast development. *Proc. Natl. Acad. Sci. U S A* **101**, 16091-16098.
- Schardl, C.L., Byrd, A.D., Benzion, G., Altschuler, M.A., Hildebrand, D.F., and Hunt, A.G.** (1987). Design and construction of a versatile system for the expression of foreign genes in plants. *Gene* **61**, 1-11.
- Soh, M.S.** (2000). REP1, a Basic Helix-Loop-Helix Protein, Is Required for a Branch Pathway of Phytochrome A Signaling in Arabidopsis. *Plant Cell* **12**, 2061-2074.
- Yamashino, T., Matsushika, A., Fujimori, T., Sato, S., Kato, T., Tabata, S., and Mizuno, T.** (2003). A link between circadian-controlled bHLH factors and the APRR1/TOC1 quintet in Arabidopsis thaliana. *Plant Cell Physiol.* **44**, 619-629.



**Zhang, Y., Mayba, O., Pfeiffer, A., Shi, H., Tepperman, J.M., Speed, T.P., and Quail, P.H.** (2013). A quartet of PIF bHLH factors provides a transcriptionally centered signaling hub that regulates seedling morphogenesis through differential expression-patterning of shared target genes in Arabidopsis. *PLoS Genet.* **9**, e1003244.
